# Bacterial Vaginosis and Behavioral Factors Associated With Incident Pelvic Inflammatory Disease in the Longitudinal Study of Vaginal Flora

Rodman Turpin,<sup>1,a</sup> Susan Tuddenham,<sup>2,a</sup> Xin He,<sup>1</sup> Mark A. Klebanoff,<sup>3</sup> Khalil G. Ghanem,<sup>2</sup> and Rebecca M. Brotman<sup>4,5,6</sup>

<sup>1</sup>Department of Epidemiology and Biostatistics, School of Public Health, University of Maryland at College Park, College Park, Maryland, USA; <sup>2</sup>Division of Infectious Diseases, Johns Hopkins University School of Medicine, Baltimore, Maryland, USA; <sup>3</sup>Center for Perinatal Research, Nationwide Children's Hospital, Columbus, Ohio, USA; <sup>4</sup>Department of Epidemiology and Public Health, University of Maryland School of Medicine, Baltimore, Maryland, USA; and <sup>5</sup>Institute for Genome Sciences, Department of Epidemiology and Public Health, University of Maryland School of Medicine, Baltimore, Maryland, USA

**Background.** Pelvic inflammatory disease (PID) leads to long-term reproductive consequences for cisgender women. Bacterial vaginosis (BV) and behavioral factors may play a role in PID pathogenesis. We assessed associations between BV, behavioral factors, and incident PID.

**Methods.** We analyzed participants (N = 2956) enrolled in the National Institutes of Health Longitudinal Study of Vaginal Flora, a cohort of nonpregnant cisgender women followed quarterly for 12 months. PID was defined by at least 1 of the following: cervical motion tenderness, uterine tenderness, or adnexal tenderness (160 cases). We tested associations between BV (measured using Nugent and Amsel criteria) and PID at the subsequent visit. Sociodemographic factors, sexual behaviors, and *Chlamydia trachomatis* (CT), untreated at baseline and concurrent with BV, were covariates in Cox proportional hazards models. Adjusting for the few *Neisseria gonorrhoeae* and *Trichomonas vaginalis* cases did not alter results.

**Results.** In multivariable modeling, Nugent-BV (adjusted hazard ratio [aHR], 1.53 [95% confidence interval {CI}, 1.05–2.21]), symptomatic Amsel-BV (aHR, 2.15 [95% CI, 1.23–3.75]), and vaginal douching (aHR, 1.47 [95% CI, 1.03–2.09]) were associated with incident PID.

**Conclusions.** BV was associated with incident PID in a large prospective cohort, controlling for behavioral factors and sexually transmitted infections (STIs). Larger studies on how BV, STIs, behaviors, and host responses interactively affect PID risk are needed.

**Keywords.** pelvic inflammatory disease; bacterial vaginosis; cohort.

Pelvic inflammatory disease (PID) represents a spectrum of inflammatory disorders of the upper female reproductive tract [1], which can lead to severe long-term reproductive consequences including tubal factor infertility, ectopic pregnancy, and chronic pelvic pain [1–6]. Despite some recent declines in PID rates, it remains common, affecting an estimated 4.4% of reproductive-aged cisgender women in the United States, with an estimated 2.5 million prevalent cases nationwide and direct treatment costs over \$2 billion annually [7]. Infertility caused by PID can also affect the emotional and mental wellness of couples seeking children. PID may result from microorganisms that ascend from the vagina or cervix to infect upper genital tract structures. Sexually transmitted infections (STIs) including *Chlamydia trachomatis* (CT), *Neisseria gonorrhoeae* (NG), and *Mycoplasma genitalium* (MG) are implicated in a substantial

proportion of cases [3–5, 8–14], while behaviors such as vaginal douching have also been associated with an increased risk of PID [15, 16]. Bacterial vaginosis (BV), a clinical condition characterized by a vaginal microbiota low in *Lactobacillus* species and dominated by facultative and anaerobic bacteria, may play a role in PID pathogenesis as well [17, 18].

Upper tract structures can be directly infected by NG, CT, and MG; these organisms may also facilitate the ascension of BV-associated organisms from the lower genital tract, presumably due to breakdown of barriers and immune defense mechanisms in the setting of inflammation [3–5, 8–14]. BV-associated bacteria are commonly found in the upper genital tract of women with PID including those in which an STI was not identified [19]. Soper et al reported vaginal microorganisms were isolated from the endometrium in 31.4% and from the cul-de-sac in 14.3% of women with acute salpingitis [20]. BV organisms have been shown in model systems to cause oviduct damage [21]. Additionally, BV has been associated with increased risk of STI acquisition [22–25]. BV may contribute to PID by increasing susceptibility to and decreasing clearance of STIs, or through synergistic relationships whereby BV-associated bacteria facilitate the ascension of STIs [21]. As up to 70% of PID cases are not linked to a known STI [14], an

<sup>a</sup>R. T. and S. T. contributed equally to this work as co-first authors.

Correspondence: Rebecca M. Brotman, PhD, MPH, Institute for Genome Sciences, Department of Epidemiology and Public Health, University of Maryland School of Medicine, 670 W Baltimore St, Room 3175, Baltimore, MD 21201 (rbrotman@som.umaryland.edu).

The Journal of Infectious Diseases® 2021;224(S2):S137–44

© The Author(s) 2021. Published by Oxford University Press for the Infectious Diseases Society of America. All rights reserved. For permissions, e-mail: journals.permissions@oup.com. DOI: 10.1093/infdis/jiab103

active area of inquiry is whether BV can independently (in the absence of STIs) induce PID [21, 26].

Currently, data on the role of BV in PID are sparse. Some, but not all, studies show a positive association between BV and PID (see review by Taylor et al) [16, 20, 21, 26–40]. The majority of studies have been cross-sectional (assessing BV at the time of PID diagnosis), and many did not control for STIs such as CT or NG [21]. Few studies have prospectively assessed BV and PID or examined BV status antecedent to incident PID [16, 26, 28, 29].

The Centers for Disease Control and Prevention and other national and professional organizations recommend annual CT and NG screening for all sexually active women in the United States under age 25 [1, 41]. Yet, PID remains common and new methods to prevent PID are needed. Novel therapeutics to treat BV and optimize the vaginal microbiota are currently under development [42]. If antecedent BV can be shown to increase risk of PID (irrespective of whether this relationship is mediated via new STI acquisition), this would support the need for further studies to elucidate mechanisms and, perhaps in the long term, to trial vaginal microbiota modification as a way to prevent PID. To date, we lack prospective, well-controlled data on the relationship between BV and PID. Here, we sought to assess whether antecedent BV is associated with incident PID diagnosis in a large prospective cohort.

## METHODS

### Parent Study

The National Institutes of Health Longitudinal Study of Vaginal Flora (LSVF) was conducted from August 1999 to February 2002 and recruited 3620 nonpregnant cisgender women (aged 15–44 years) through clinics in Birmingham, Alabama [43]. Exclusion criteria included immunocompromised status, hysterectomy, menopause, pelvic radiotherapy, antibiotic therapy >30 days, nonfluency in English, plans to move within the next 12 months, participation in a clinical trial using antibiotics or genital microbicides, and limitations preventing informed consent. Participants were followed quarterly for approximately 12 months with clinical examinations and surveys. All participants gave written informed consent, and the study was approved by the institutional review boards of the National Institute of Child Health and Human Development, the Jefferson County Department of Health, and the University of Alabama at Birmingham; the Human Research Protections Office at the University of Maryland, Baltimore approved secondary analysis of the data.

### Measures

#### Incident PID

Clinical signs of PID, including cervical motion tenderness, uterine tenderness, and adnexal tenderness, were measured at each visit. For this analysis, PID was defined if at least 1 of these

signs was present, based on current CDC guidelines for minimum clinical signs for the identification of presumptive PID [1]. Incident PID was the first visit at which the case definition was met after baseline. As this was a time-to-event data analysis, women not developing PID contributed data until their last study visit (right-censoring).

#### Bacterial Vaginosis

At each visit, vaginal fluid was collected for vaginal smears. Gram stains were performed and categorized using the Nugent scoring method as low, intermediate, or high (0–3, 4–6, and 7–10, respectively) [44]. High Nugent scores are indicative of BV and for clarity are termed “Nugent-BV” [17]. Additionally, clinical diagnosis of BV was assessed using Amsel criteria (having 3 of the following clinician-assessed signs: thin homogeneous vaginal discharge, vaginal pH >4.5, the presence of a fishy odor upon adding potassium hydroxide solution to vaginal secretions, and/or clue cells on microscopy) [45]. Diagnosis by Amsel criteria has also been recently termed “Amsel-BV” [17]. Clinicians directly questioned women regarding vaginal symptoms (including vaginal discharge, irritation, itching, burning, foul odor, and other), and then coded those that met Amsel criteria for BV as “symptomatic BV” or “asymptomatic BV” based on their clinical judgement [17]. Participants with symptomatic Amsel-BV were treated with standard of care (metronidazole or clindamycin [46]). To maintain temporal proximity with incident PID, and not concurrence, we evaluated the association between both Nugent-BV and Amsel-BV with PID at the subsequent visit 3 months later.

#### STI Screening

Endocervical swabs were utilized for all STI testing. As the study was conducted in the early 2000s, NG was assessed using Thayer-Martin agar culture and *Trichomonas vaginalis* (TV) was assessed by wet mount and InPouch culture at each visit [43]. Universal CT screening of participants at each visit was initiated partway into cohort recruitment based on introduction and new availability of ligase chain reaction (LCR; Abbott Laboratories, Abbott Park, Illinois). Prior to this, consent documents specifically informed women that CT screening was not done as part of routine study procedures, and indicated that participants should continue to follow up with their primary providers for routine CT screening [46]. All endocervical swab samples collected in the early part of the study, which had not previously been tested, were tested for CT with LCR after study completion. Because of this CT screening protocol in the first 2 years of study, there were some cases of untreated CT detected. CT, NG, and TV were defined as treated if the participant was prescribed or self-reported use of an unknown antibiotic or an antibiotic potentially active against that particular STI (ie, macrolides, tetracyclines or fluoroquinolones for CT,  $\beta$ -lactams, macrolides, tetracyclines or fluoroquinolones for

GC, and nitroimidazoles for TV), or a study clinician treated a participant for an STI in the 60-day interval prior to the visit, on the visit, or in the study interval after the visit. Detailed antibiotic use information was collected, including referral to STI clinics for treatment, clinic visit prescriptions, and those taken by participants for any STI and non-STI indications between study visits.

For analyses, we used both CT status at baseline that had not been treated with antibiotics (untreated CT) as well as CT ( $n = 28$  untreated,  $n = 3$  treated) antecedent to PID (at the visit prior to incident PID). NG and TV could not be modeled individually because there were very few untreated participants ( $n = 3$  NG,  $n = 5$  TV) who were observed to have incident PID. However, we conducted a sensitivity analysis incorporating a composite variable for both untreated CT/NG/TV at baseline and any CT/NG/TV antecedent to PID.

#### *Time-Varying Survey Factors*

Time-varying behaviors were queried at each visit and reflected history in the 3 months prior to each follow-up visit and 6 months prior to baseline. Frequency of douching was categorized in the prior interval to no douching, less than weekly, weekly, or more. Sexual risk behaviors included number of sexual partners ( $0-1$ ,  $\geq 2$ ) and frequency of condom use (never, some of the time, always).

#### *Sociodemographics*

Sociodemographic factors including age (years), race (black, white, other), highest education level (high school and under, above high school), marital status (married, not married), and monthly household income ( $< \$500$ ,  $\$500-\$800$ ,  $\$800-\$3000$ ,  $> \$3000$ ) were queried at baseline. Due to very few participants in the “Other” racial group, results for this category were not reported.

#### *Missing Data*

There was  $< 2\%$  missing data for all measures except income and sexual behaviors, which had a maximum of 9% missingness. To address this, monotone multiple imputation was used to generate 10 imputed datasets that were used for all model analyses. We imputed household income using nonmissing data from race, age, education level, and marital status, as these were all associated with household income in our dataset. Missing sexual behaviors were imputed based on other sexual behaviors. For observations with all sexual behaviors missing ( $n = 3$ ), age, education level, and marital status were used to impute missing sexual behaviors.

#### *Statistical Analysis*

We tested risk factors associated with incident PID including Nugent category, Amsel-BV (both symptomatic and asymptomatic), untreated CT infection at baseline, CT infection antecedent to PID, douching, sexual risk behaviors, and

sociodemographic measures. We used  $\chi^2$  and Fisher exact tests for categorical factors, and Cochran–Armitage trend tests for ordinal factors.

Cox proportional hazards models were used to test whether Nugent score, Amsel-BV, untreated CT infection at baseline, CT infection antecedent to PID, douching, and sexual risk behaviors were associated with risk of incident PID. The time to incident PID was observed for women with PID diagnosis but right-censored at the last visit for those without incident PID. We generated both unadjusted models and models adjusted for all other factors. The proportional hazards assumption was assessed using scaled Schoenfeld residuals for all models. All analyses were conducted using SAS version 9.4 software (SAS Institute, Cary, North Carolina).

#### *Analytic Sample*

We excluded 123 participants who met any criteria of PID at baseline, 13 participants with missing PID data, and 434 participants with no follow-up visits. Observations with incomplete baseline measures after imputation ( $n = 92$ ) were excluded. We removed 2 observations that were outliers based on high leverages. The final sample consisted of 2956 participants.

## **RESULTS**

The 2956 participants contributed a total 2516.2 person-years, with a median of 349 days contributed per participant. The person-time contributed by each participant ranged from 49 to 456 days. Demographic and time-varying factors are displayed in [Table 1](#) and [Supplementary Table 1](#). Women in our analytic sample were predominantly black (82.6%) and unmarried (83.5%); most women had a high school education or less (73.4%) and had monthly income of either  $\$500-\$800$  (29.5%) or  $\$800-\$3000$  (42.3%). Of the 2956 participants, 160 (5.4%) had incident PID over the study period, equating to an incidence rate of 6.36 PID cases per 100 person-years. Sixteen women (10.0%) classified as having incident PID had all 3 clinical signs (cervical motion tenderness, uterine tenderness, and either right or left adnexal tenderness), and 34 women (21.3%) had 2 of these clinical signs. Thirty-one (19.4%) incident PID cases tested positive for CT at the visit prior to PID diagnosis. At the time of PID diagnosis, 12 (7.5%) cases tested positive for CT, 4 (2.5%) tested positive for NG, and 15 (9.4%) tested positive for TV. Nugent-BV was observed in 40.9% of the sample, while 8.2% of the sample had symptomatic Amsel-BV. Douching was reported by 40.0% of the sample. Furthermore, 66.2% of women with high Nugent scores at baseline had high Nugent scores prior to incident PID, whereas 65.0% of women with low Nugent scores at baseline had low Nugent scores prior to incident PID. Among women with intermediate BV at baseline, 36.0% had intermediate BV prior to incident PID. Overall, between baseline and visit prior to incident PID, 87.0% of women remained either within their same Nugent score category or an

**Table 1. Bacterial Vaginosis, Chlamydia, and Covariates Across Incident Pelvic Inflammatory Disease (N = 2956)**

| Characteristic                                | Total (N = 2956), No. | No Incident PID (n = 2796 [94.6%]), % | Incident PID (n = 160 [5.4%]), % |
|-----------------------------------------------|-----------------------|---------------------------------------|----------------------------------|
| <b>Baseline demographic factors</b>           |                       |                                       |                                  |
| Age, y <sup>a</sup>                           |                       |                                       |                                  |
| 18–20                                         | 710                   | 24.3                                  | 20.0                             |
| 21–24                                         | 959                   | 32.3                                  | 34.4                             |
| 25–29                                         | 579                   | 19.5                                  | 21.3                             |
| 30–34                                         | 328                   | 11.2                                  | 9.4                              |
| ≥35                                           | 380                   | 12.7                                  | 15.0                             |
| Race <sup>b</sup>                             |                       |                                       |                                  |
| Black                                         | 2443                  | 82.7                                  | 81.3                             |
| White                                         | 513                   | 17.3                                  | 18.8                             |
| Education level <sup>b</sup>                  |                       |                                       |                                  |
| Greater than high school                      | 788                   | 26.8                                  | 25.0                             |
| High school or less                           | 2168                  | 73.3                                  | 75.0                             |
| Monthly income <sup>a,c</sup>                 |                       |                                       |                                  |
| Less than \$500                               | 566                   | 20.4                                  | 28.5                             |
| \$500–\$800                                   | 803                   | 29.8                                  | 24.3                             |
| \$800–\$3000                                  | 1152                  | 42.5                                  | 38.9                             |
| Greater than \$3000                           | 200                   | 7.3                                   | 8.3                              |
| Marital status <sup>b</sup>                   |                       |                                       |                                  |
| Unmarried                                     | 2471                  | <b>84.1</b>                           | <b>75.0</b>                      |
| Married                                       | 485                   | <b>15.9</b>                           | <b>25.0</b>                      |
| Time-varying factors <sup>d</sup>             |                       |                                       |                                  |
| Douching <sup>a,c</sup>                       |                       |                                       |                                  |
| Never                                         | 1770                  | <b>60.6</b>                           | <b>49.4</b>                      |
| Less than weekly                              | 947                   | <b>31.6</b>                           | <b>40.6</b>                      |
| Weekly or more                                | 234                   | <b>7.8</b>                            | <b>10.0</b>                      |
| No. of sex partners <sup>a,c</sup>            |                       |                                       |                                  |
| 0                                             | 538                   | 18.2                                  | 18.8                             |
| 1                                             | 2256                  | 76.7                                  | 72.5                             |
| ≥2                                            | 157                   | 5.1                                   | 8.8                              |
| Condom use <sup>a,c</sup>                     |                       |                                       |                                  |
| Never                                         | 1840                  | 62.2                                  | 65.8                             |
| Some of the time                              | 498                   | 16.9                                  | 16.5                             |
| Always                                        | 610                   | 20.9                                  | 17.7                             |
| <b>BV and STIs</b>                            |                       |                                       |                                  |
| Nugent score antecedent to PID <sup>e</sup>   |                       |                                       |                                  |
| Low (0–3)                                     | 1114                  | <b>38.1</b>                           | <b>30.6</b>                      |
| Intermediate (4–6)                            | 644                   | <b>21.8</b>                           | <b>21.9</b>                      |
| High (7–10)                                   | 1198                  | <b>40.1</b>                           | <b>47.5</b>                      |
| Amsel criteria antecedent to PID <sup>e</sup> |                       |                                       |                                  |
| No Amsel-BV                                   | 1770                  | <b>60.4</b>                           | <b>51.3</b>                      |
| Asymptomatic BV                               | 1024                  | <b>34.4</b>                           | <b>39.4</b>                      |
| Symptomatic BV                                | 162                   | <b>5.3</b>                            | <b>9.4</b>                       |
| Baseline untreated CT <sup>f</sup>            |                       |                                       |                                  |
| No                                            | 2714                  | <i>92.0</i>                           | <i>88.1</i>                      |
| Yes                                           | 242                   | <i>8.0</i>                            | <i>11.9</i>                      |
| CT antecedent to PID <sup>a,f</sup>           |                       |                                       |                                  |

**Table 1. Continued**

| Characteristic | Total (N = 2956), No. | No Incident PID (n = 2796 [94.6%]), % | Incident PID (n = 160 [5.4%]), % |
|----------------|-----------------------|---------------------------------------|----------------------------------|
| No             | 2234                  | 75.3                                  | 80.6                             |
| Yes            | 722                   | 24.7                                  | 19.4                             |

Significant ( $P < .05$ ) values are shown in bold; marginally significant variables (between  $P < .05$  and  $P < .10$ ) are shown in italics.

Abbreviations: BV, bacterial vaginosis; CT, *Chlamydia trachomatis*; PID, pelvic inflammatory disease; STI, sexually transmitted infection.

<sup>a</sup>Cochran–Armitage trend test.

<sup>b</sup> $\chi^2$  test.

<sup>c</sup>Preimputation frequencies are reported for imputed variables.

<sup>d</sup>Baseline time-varying factors have a recall period of 6 months. All subsequent time points for time-varying factors have a recall period of 3 months.

<sup>e</sup>Antecedent to PID: at the visit prior to incident PID.

<sup>f</sup>Fisher exact test.

adjacent category of Nugent score (low to intermediate; intermediate to high). [Supplementary Table 1](#) also shows patterns of BV and time-varying factors across time points.

Three (9.7%) CT cases diagnosed at the visit prior to incident PID were not treated. Four (12.9%) cases with a positive CT at the visit prior to incident PID had CT detected again at the time of PID diagnosis 3 months later. Those with incident PID were more likely to have untreated CT at baseline, engage in douching, and be married.

In univariate analysis ([Table 2](#)), both high Nugent score compared to low Nugent score (hazard ratio [HR], 1.42 [95% confidence interval {CI}, 1.01–2.02]) and symptomatic Amsel-BV compared to no Amsel-BV (HR, 2.04 [95% CI, 1.17–3.53]) were associated with greater risk of incident PID. After adjusting for sociodemographic and behavioral factors, as well as baseline untreated CT and CT antecedent to PID, asymptomatic Amsel-BV (adjusted HR [aHR], 1.52 [95% CI, 1.01–2.30]) and symptomatic Amsel-BV (aHR, 1.94 [95% CI, 1.11–3.41]) remained associated with greater risk of incident PID. Other factors associated with incident PID included baseline untreated CT, douching, and being married. Having CT antecedent to PID (90.3% of which was treated) was associated with lower risk of PID. The scaled Schoenfeld residual test did not indicate violations of proportional hazards ( $P > .05$ ). Finally, when we conducted a sensitivity analysis using a combined NG/CT/TV variable in place of CT (for both baseline untreated and any antecedent CT), results remained consistent.

## DISCUSSION

In a prospective observational study of 2956 women of reproductive age, we found that antecedent BV was associated with incident PID independent of relevant demographic, behavioral, and STI factors. Some, but not all, previous studies have found a positive association between BV and PID [21]. However, the majority of these studies have been cross-sectional, assessing BV at the time of PID diagnosis, and most did not control for



**Table 2. Bacterial Vaginosis, Sexually Transmitted Infections, and Behaviors Associated With Incident Pelvic Inflammatory Disease (N = 2956)**

| Characteristic                                             | Unadjusted              | Adjusted <sup>a</sup>   |
|------------------------------------------------------------|-------------------------|-------------------------|
| Baseline demographic factors                               |                         |                         |
| Age                                                        |                         |                         |
| Continuous (years)                                         | 1.01 (.99–1.03)         | 1.00 (.97–1.02)         |
| Race <sup>a</sup>                                          |                         |                         |
| Black                                                      | Reference               | Reference               |
| White                                                      | 1.19 (.80–1.77)         | 0.96 (.60–1.55)         |
| Education level <sup>b</sup>                               |                         |                         |
| Greater than high school                                   | Reference               | Reference               |
| High school or less                                        | 1.12 (.78–1.60)         | 1.05 (.70–1.58)         |
| Monthly income                                             |                         |                         |
| Less than \$500                                            | Reference               | Reference               |
| \$500–\$800                                                | <b>0.58 (.37–.91)</b>   | <b>0.57 (.36–.90)</b>   |
| \$800–\$3000                                               | <b>0.65 (.43–.97)</b>   | <b>0.57 (.37–.88)</b>   |
| More than \$3000                                           | 0.85 (.44–1.61)         | 0.82 (.42–1.60)         |
| Marital status                                             |                         |                         |
| No                                                         | Reference               | Reference               |
| Yes                                                        | <b>1.83 (1.28–2.62)</b> | <b>2.15 (1.39–3.30)</b> |
| Time-varying factors, prior 3 mo <sup>b</sup>              |                         |                         |
| Vaginal douching                                           |                         |                         |
| Never                                                      | Reference               | Reference               |
| Less than weekly                                           | <b>1.51 (1.09–2.10)</b> | <b>1.47 (1.03–2.09)</b> |
| Weekly or more                                             | 1.60 (.93–2.74)         | 1.42 (.75–2.28)         |
| No. of sex partners                                        |                         |                         |
| 0                                                          | Reference               | Reference               |
| 1                                                          | <b>1.45 (1.05–2.00)</b> | 0.87 (.55–1.37)         |
| ≥2                                                         | 1.40 (.81–2.43)         | 1.65 (.81–3.35)         |
| Condom use                                                 |                         |                         |
| Never                                                      | Reference               | Reference               |
| Some of the time                                           | 0.95 (.62–1.46)         | 0.93 (.57–1.52)         |
| Always                                                     | 0.79 (.52–1.19)         | 0.86 (.53–1.40)         |
| BV and STIs                                                |                         |                         |
| Nugent score antecedent to PID <sup>c</sup>                |                         |                         |
| Low (0–3)                                                  | Reference               | Reference               |
| Intermediate (4–6)                                         | 1.25 (.81–1.93)         | 1.24 (.77–2.01)         |
| High (7–10)                                                | <b>1.42 (1.01–2.02)</b> | <b>1.52 (1.01–2.30)</b> |
| Amsel criteria (3 out of 4) antecedent to PID <sup>c</sup> |                         |                         |
| No Amsel-BV                                                | Reference               | Reference               |
| Asymptomatic BV                                            | 1.31 (.95–1.82)         | 1.34 (.96–1.88)         |
| Symptomatic BV                                             | <b>2.04 (1.17–3.53)</b> | <b>1.94 (1.11–3.41)</b> |
| Untreated CT, baseline visit                               |                         |                         |
| No                                                         | Reference               | Reference               |
| Yes                                                        | <b>1.55 (1.00–2.46)</b> | <b>3.87 (1.76–8.48)</b> |
| CT antecedent to PID <sup>c</sup>                          |                         |                         |
| No                                                         | Reference               | Reference               |
| Yes                                                        | 0.68 (.46–1.00)         | <b>0.37 (.19–.72)</b>   |

Data are presented as hazard ratio (95% confidence interval). Significant ( $P < .05$ ) values are shown in bold; marginally significant variables (between  $P < .05$  and  $P < .10$ ) are shown in italics. Abbreviations: BV, bacterial vaginosis; CT, *Chlamydia trachomatis*; PID, pelvic inflammatory disease; STI, sexually transmitted infection.

<sup>a</sup>Amsel criteria and Nugent score were not adjusted for each other, but were adjusted for all other variables shown in table.

<sup>b</sup>Baseline time-varying factors have a recall period of 6 months. All subsequent time points for time-varying factors have a recall period of 3 months.

<sup>c</sup>Antecedent to PID: at the visit prior to incident PID.

infection with CT or NG [21]. The 1 large prospective study that followed women over 3 years did not show a relationship

between Nugent-BV at baseline or 6 months prior to PID diagnosis, when controlling for NG or CT infection at entry into the study; 19.4% of women with BV in that study also had NG infection, CT infection, or both [28]. However, unlike our study, this report did not control for STI diagnosis at the time of BV diagnosis, antecedent to PID. Importantly, a subsequent analysis of the same data found that women with the highest tertile growth based on vaginal culture of several BV-associated organisms were more likely than those in the lowest tertile to experience incident PID [29]. A second study following women with PID prospectively after diagnosis found that specific BV-associated bacteria were more likely to be observed in women with endometritis as well as those with recurrent PID and infertility [27]. Finally, a small study ( $n = 17$  women with PID,  $n = 17$  without) utilizing quantitative polymerase chain reaction on vaginal specimens taken within 3 months prior to a PID diagnosis found that specific BV-associated bacteria (*Atopobium vaginae*, *Sneathia* species, BVAB-TM7, *Megasphaera* species, *Eggerthella*-like bacterium, and *Mobiluncus* species) were associated with incident PID, although they were unable to control for CT as all cases had CT and all controls did not [26]. Thus, our study expands the existing literature on the topic.

Additionally, we found that douching and having untreated CT at baseline were associated with incident PID, consistent with previous studies [15, 16]. Increased risk may relate to the potential for douching to enhance ascension of organisms from the lower to upper urogenital tract. It is unclear why marital status was associated with an increased risk of incident PID in this cohort when adjusting for biobehavioral risk factors. This association has been found in at least 1 other study [47], but that study did not control for behavioral factors.

Our study presents an analysis adjusted for major confounders, is prospective, and represents one of the largest cohorts to date in which the relationship between BV and PID has been examined. However, there are a number of limitations. First, the study is geographically and racially homogeneous, as it was limited to clinics in the Birmingham, Alabama area, and was comprised primarily of black women. However, black women are disproportionately affected by BV and PID. The exclusion of participants not fluent in English is also an important limitation to consider. We were only able to follow participants for approximately 1 year, limiting our ability to detect incident PID beyond that timeframe. Future research examining the association between BV and PID longitudinally may help to better understand how BV affects long-term risk of PID. The PID definition using 1 or more clinical signs may lack specificity; however, the LSVF was designed around vaginitis as a research focus, and PID status was not recorded by clinicians. Even if it had been recorded, CDC guidelines at the time (1998) [46] were more stringent than current guidelines, requiring 3 clinical signs (lower abdominal tenderness, adnexal tenderness, and cervical motion tenderness for PID

diagnosis). The gold standard for PID diagnosis, histologic documentation, was not collected, though this necessitates invasive biopsy procedures and is impractical for standard clinical settings. We were also unable to test individual STIs other than CT due to infrequency among PID cases. Douching and sexual risk behaviors are self-reported, which may result in underascertainment. Finally, the vaginal microbiota may fluctuate [48], and assessing BV at 1 point in time may obscure relevant associations, although women with BV often have recurrent BV [49]. We assessed BV both by clinical criteria and microscopic assessment.

In summary, antecedent BV was significantly associated with incident PID in a large prospective cohort of women. New studies suggest that novel, more effective methods for vaginal microbiota optimization, including probiotics, may be on the horizon [42], raising interest in vaginal microbiota modification to prevent PID and other adverse reproductive outcomes. Further studies to elucidate the mechanisms by which BV, STIs, behaviors, and host responses interact to affect PID risk are needed.

### Supplementary Data

Supplementary materials are available at *The Journal of Infectious Diseases* online. Consisting of data provided by the authors to benefit the reader, the posted materials are not copyedited and are the sole responsibility of the authors, so questions or comments should be addressed to the corresponding author.

### Notes

**Financial support.** The following authors were supported by the National Institute of Allergy and Infectious Diseases: R. B., M. A. K., R. T., X. H., and K. G. G. (grant number R01-AI116799); R. B., X. H., and K. G. G. (grant number R01-AI119012); and S. T. (grant number K23-AI125715). The Longitudinal Study of Vaginal Flora and M. A. K. were funded by the National Institute of Child Health and Human Development (grant number Z01-HD002535).

**Supplement sponsorship.** This supplement is sponsored by the Centers for Disease Control and Prevention.

**Potential conflicts of interest.** S. T. has been a consultant for Biofire Diagnostics, Roche Molecular Diagnostics, and Luca Biologics, and has received speaker honoraria from Roche Molecular Diagnostics. All other authors report no potential conflicts of interest.

All authors have submitted the ICMJE Form for Disclosure of Potential Conflicts of Interest. Conflicts that the editors consider relevant to the content of the manuscript have been disclosed.

### References

1. Workowski KA. Centers for Disease Control and Prevention sexually transmitted diseases treatment guidelines. *Clin Infect Dis* **2015**; 61(Suppl 8):S759–62.

2. Anyalechi GE, Hong J, Kreisel K, et al. Self-reported infertility and associated pelvic inflammatory disease among women of reproductive age—National Health and Nutrition Examination Survey, United States, 2013–2016. *Sex Transm Dis* **2019**; 46:446–51.
3. Chambers LC, Khosropour CM, Katz DA, Dombrowski JC, Manhart LE, Golden MR. Racial/ethnic disparities in the lifetime risk of *Chlamydia trachomatis* diagnosis and adverse reproductive health outcomes among women in King County, Washington. *Clin Infect Dis* **2018**; 67:593–9.
4. den Heijer CDJ, Hoebe CJP, Driessen JHM, et al. *Chlamydia trachomatis* and the risk of pelvic inflammatory disease, ectopic pregnancy, and female infertility: a retrospective cohort study among primary care patients. *Clin Infect Dis* **2019**; 69:1517–25.
5. Hoenderboom BM, van Benthem BHB, van Bergen JEAM, et al. Relation between *Chlamydia trachomatis* infection and pelvic inflammatory disease, ectopic pregnancy and tubal factor infertility in a Dutch cohort of women previously tested for chlamydia in a chlamydia screening trial. *Sex Transm Infect* **2019**; 95:300–6.
6. Kreisel K, Torrone E, Bernstein K, Hong J, Gorwitz R. Prevalence of pelvic inflammatory disease in sexually experienced women of reproductive age—United States, 2013–2014. *MMWR Morb Mortal Wkly Rep* **2017**; 66:80–3.
7. Jaiyeoba O, Lazenby G, Soper DE. Recommendations and rationale for the treatment of pelvic inflammatory disease. *Expert Rev Anti Infect Ther* **2011**; 9:61–70.
8. Price MJ, Ades AE, Welton NJ, Simms I, Macleod J, Horner PJ. Proportion of pelvic inflammatory disease cases caused by *Chlamydia trachomatis*: consistent picture from different methods. *J Infect Dis* **2016**; 214:617–24.
9. Reekie J, Donovan B, Guy R, et al; Chlamydia and Reproductive Health Outcome Investigators; Chlamydia and Reproductive Health Outcome Investigators. Risk of pelvic inflammatory disease in relation to chlamydia and gonorrhea testing, repeat testing, and positivity: a population-based cohort study. *Clin Infect Dis* **2018**; 66:437–43.
10. Bautista CT, Hollingsworth BP, Sanchez JL. Repeat chlamydia diagnoses increase the hazard of pelvic inflammatory disease among US Army women: a retrospective cohort analysis. *Sex Transm Dis* **2018**; 45:770–3.
11. Sabbatucci M, Salfa MC, Regine V, Pezzotti P, Suligo B. Estimated burden of *Chlamydia trachomatis* female infection and consequent severe pelvic inflammatory disease, Italy, 2005–2016. *Ann Ist Super Sanita* **2019**; 55:217–23.
12. Khanal B, Siwakoti S, Uprety D, Poudyal N, Sharma A, Bhattarai NR. *Chlamydia trachomatis* in women with pelvic inflammatory disease (PID): report from a tertiary center in eastern Nepal. *Trop Doct* **2019**; 49:101–4.

13. Hafner LM. Pathogenesis of fallopian tube damage caused by *Chlamydia trachomatis* infections. *Contraception* **2015**; 92:108–15.
14. Haggerty CL, Taylor BD. *Mycoplasma genitalium*: an emerging cause of pelvic inflammatory disease. *Infect Dis Obstet Gynecol* **2011**; 2011:959816.
15. Wølner-Hanssen P, Eschenbach DA, Paavonen J, et al. Association between vaginal douching and acute pelvic inflammatory disease. *JAMA* **1990**; 263:1936–41.
16. Ness RB, Hillier SL, Kip KE, et al. Douching, pelvic inflammatory disease, and incident gonococcal and chlamydial genital infection in a cohort of high-risk women. *Am J Epidemiol* **2005**; 161:186–95.
17. McKinnon LR, Achilles SL, Bradshaw CS, et al. The evolving facets of bacterial vaginosis: implications for HIV transmission. *AIDS Res Hum Retroviruses* **2019**; 35:219–28.
18. Ravel J, Moreno I, Simon C. Bacterial vaginosis and its association with infertility, endometritis and pelvic inflammatory disease [manuscript published online ahead of print 19 October 2020]. *Am J Obstet Gynecol* **2020**. doi:10.1016/j.ajog.2020.10.019.
19. Hebb JK, Cohen CR, Astete SG, Bukusi EA, Totten PA. Detection of novel organisms associated with salpingitis, by use of 16S rDNA polymerase chain reaction. *J Infect Dis* **2004**; 190:2109–20.
20. Soper DE, Brockwell NJ, Dalton HP, Johnson D. Observations concerning the microbial etiology of acute salpingitis. *Am J Obstet Gynecol* **1994**; 170:1008–14; discussion 14–7.
21. Taylor BD, Darville T, Haggerty CL. Does bacterial vaginosis cause pelvic inflammatory disease? *Sex Transm Dis* **2013**; 40:117–22.
22. van der Veer C, Bruisten SM, van der Helm JJ, de Vries HJ, van Houdt R. The cervicovaginal microbiota in women notified for *Chlamydia trachomatis* infection: a case-control study at the sexually transmitted infection outpatient clinic in Amsterdam, the Netherlands. *Clin Infect Dis* **2017**; 64:24–31.
23. Tamarelle J, Thiébaud ACM, de Barbeyrac B, Bébéar C, Ravel J, Delarocque-Astagneau E. The vaginal microbiota and its association with human papillomavirus, *Chlamydia trachomatis*, *Neisseria gonorrhoeae* and *Mycoplasma genitalium* infections: a systematic review and meta-analysis. *Clin Microbiol Infect* **2019**; 25:35–47.
24. Brotman RM. Vaginal microbiome and sexually transmitted infections: an epidemiologic perspective. *J Clin Invest* **2011**; 121:4610–7.
25. Brotman RM, Klebanoff MA, Nansel TR, et al. Bacterial vaginosis assessed by gram stain and diminished colonization resistance to incident gonococcal, chlamydial, and trichomonal genital infection. *J Infect Dis* **2010**; 202:1907–15.
26. Gondwe T, Ness R, Totten PA, et al. Novel bacterial vaginosis-associated organisms mediate the relationship between vaginal douching and pelvic inflammatory disease. *Sex Transm Infect* **2020**; 96:439–44.
27. Haggerty CL, Totten PA, Tang G, et al. Identification of novel microbes associated with pelvic inflammatory disease and infertility. *Sex Transm Infect* **2016**; 92:441–6.
28. Ness RB, Hillier SL, Kip KE, et al. Bacterial vaginosis and risk of pelvic inflammatory disease. *Obstet Gynecol* **2004**; 104:761–9.
29. Ness RB, Kip KE, Hillier SL, et al. A cluster analysis of bacterial vaginosis-associated microflora and pelvic inflammatory disease. *Am J Epidemiol* **2005**; 162:585–90.
30. Peipert JF, Montagna AB, Cooper AS, Sung CJ. Bacterial vaginosis as a risk factor for upper genital tract infection. *Am J Obstet Gynecol* **1997**; 177:1184–7.
31. Paavonen J, Teisala K, Heinonen PK, et al. Microbiological and histopathological findings in acute pelvic inflammatory disease. *Br J Obstet Gynaecol* **1987**; 94:454–60.
32. Haggerty CL, Hillier SL, Bass DC, Ness RB; PID Evaluation and Clinical Health Study Investigators. Bacterial vaginosis and anaerobic bacteria are associated with endometritis. *Clin Infect Dis* **2004**; 39:990–5.
33. Korn AP, Bolan G, Padian N, Ohm-Smith M, Schachter J, Landers DV. Plasma cell endometritis in women with symptomatic bacterial vaginosis. *Obstet Gynecol* **1995**; 85:387–90.
34. Eschenbach DA, Hillier S, Critchlow C, Stevens C, DeRouen T, Holmes KK. Diagnosis and clinical manifestations of bacterial vaginosis. *Am J Obstet Gynecol* **1988**; 158:819–28.
35. Peipert JF, Ness RB, Blume J, et al. Clinical predictors of endometritis in women with symptoms and signs of pelvic inflammatory disease. *Am J Obstet Gynecol* **2001**; 184:856–63; discussion 63–4.
36. Wiesenfeld HC, Sweet RL, Ness RB, Krohn MA, Amortegui AJ, Hillier SL. Comparison of acute and sub-clinical pelvic inflammatory disease. *Sex Transm Dis* **2005**; 32:400–5.
37. Yudin MH, Hillier SL, Wiesenfeld HC, Krohn MA, Amortegui AA, Sweet RL. Vaginal polymorphonuclear leukocytes and bacterial vaginosis as markers for histologic endometritis among women without symptoms of pelvic inflammatory disease. *Am J Obstet Gynecol* **2003**; 188:318–23.
38. Hillier SL, Kiviat NB, Hawes SE, et al. Role of bacterial vaginosis-associated microorganisms in endometritis. *Am J Obstet Gynecol* **1996**; 175:435–41.
39. Andrews WW, Hauth JC, Cliver SP, Conner MG, Goldenberg RL, Goepfert AR. Association of asymptomatic bacterial vaginosis with endometrial microbial colonization

- and plasma cell endometritis in nonpregnant women. *Am J Obstet Gynecol* **2006**; 195:1611–6.
40. Brotman RM, Erbeling EJ, Jamshidi RM, Klebanoff MA, Zenilman JM, Ghanem KG. Findings associated with recurrence of bacterial vaginosis among adolescents attending sexually transmitted diseases clinics. *J Pediatr Adolesc Gynecol* **2007**; 20:225–31.
  41. Khosropour CM, Broad JM, Scholes D, Saint-Johnson J, Manhart LE, Golden MR. Estimating chlamydia screening coverage: a comparison of self-report and health care effectiveness data and information set measures. *Sex Transm Dis* **2014**; 41:665–70.
  42. Cohen CR, Wierzbicki MR, French AL, et al. Randomized trial of lactin-V to prevent recurrence of bacterial vaginosis. *N Engl J Med* **2020**; 382:1906–15.
  43. Klebanoff MA, Schwebke JR, Zhang J, Nansel TR, Yu KF, Andrews WW. Vulvovaginal symptoms in women with bacterial vaginosis. *Obstet Gynecol* **2004**; 104:267–72.
  44. Nugent RP, Krohn MA, Hillier SL. Reliability of diagnosing bacterial vaginosis is improved by a standardized method of Gram stain interpretation. *J Clin Microbiol* **1991**; 29:297–301.
  45. Amsel R, Totten PA, Spiegel CA, Chen KC, Eschenbach D, Holmes KK. Nonspecific vaginitis. Diagnostic criteria and microbial and epidemiologic associations. *Am J Med* **1983**; 74:14–22.
  46. Centers for Disease Control and Prevention. 1998 guidelines for treatment of sexually transmitted diseases. *MMWR Recomm Rep* **1998**; 47:1–111.
  47. Bloom MS, Hu Z, Gaydos JC, Brundage JF, Tobler SK. Incidence rates of pelvic inflammatory disease diagnoses among Army and Navy recruits potential impacts of chlamydia screening policies. *Am J Prev Med* **2008**; 34:471–7.
  48. Gajer P, Brotman RM, Bai G, et al. Temporal dynamics of the human vaginal microbiota. *Sci Transl Med* **2012**; 4:132ra52.
  49. Bradshaw CS, Morton AN, Hocking J, et al. High recurrence rates of bacterial vaginosis over the course of 12 months after oral metronidazole therapy and factors associated with recurrence. *J Infect Dis* **2006**; 193:1478–86.
